# Supplementary material for: Oral Health status and Dental Service Utilization among school adolescents of Mohmand Agency, Pakistan using Anderson Model. A cross-sectional study
Source: Research Square preprint supplement (doi:10.21203/rs.3.rs-8441003/v1), 2026-01-16

**English Questionnaire**

**Oral health status and dental service utilization among school adolescents of Mohmand Agency using Anderson Model. A cross-sectional study.**

**Questionnaire:**

Identification Number:

**1) PREDISPOSING FACTORS**

**a) Age:**

**b) Gender:** (1) Male (2) Female

**c) Education:**

1. Class 6th
2. Class 7th
3. Class 8th
4. Class 9th
5. Class 10th

**2) ENABLING FACTORS**

**a) Residence:** 1) Urban 2) Rural

**b) Parents Income:**

**c) Availability of dental facilities**

1. Private practitioner/ private hospital
2. Government Hospital
3. None
4. Don’t know

**d) Time taken to reach dental facilities**

1. Less than half an hour
2. Half an hour to one hour
3. More than one hour
4. Can’t say

**3) SELF-REPORTED GENERAL HEALTH STATUS**

**a) Systemic diseases**: 1) Yes 2) No

**b) Regular use of medicines**: 1) Yes 2) No

**4) PERSONAL HEALTH SERVICES**

**a) How often do you clean your teeth?**

1) Never 2) Once a month 3) 2-3 times a month

4) Once a week 5) 2-6times a week 6) Once a day

7) Twice or more a day

**b) Do you use toothpaste to clean your teeth?** 1) Yes 2) No

**c) How often do you use cigarettes?**

1) Never 2) Seldom 3) Several a times a month

4) Once a week 5) several times a week 6) Everyday

**d) How long is it since you last saw a dentist?**

1) Less than 6 months

2) 6-12 months

3) More than 1 year but less than 2 years

4) 2 years or more but less than 5 years

5) 5 years or more

6) Never received dental care

**e) What are the reasons for not visiting the dentist?**

1. Didn’t have a dental problem
2. No service available
3. Can’t afford
4. Afraid of dentist
5. Too busy
6. Any other reason

**(5) NEED BASED FACTORS**

**(I) SELF-REPORTED**

**a) State of teeth:** 1) Excellent 2) Very Good

3) Good 4) Average

5) Poor 6) Very Poor

7) Don't know

**b) During the past 12 months, did your teeth or mouth cause any pain or discomfort?**

1) Yes 2) No 3) Don't know 4) No answer

**c) Dry mouth:**

1) Never 2) Sometimes 3) Often 4) Always

**DMFT Index Chart by World Health Organization (WHO)**


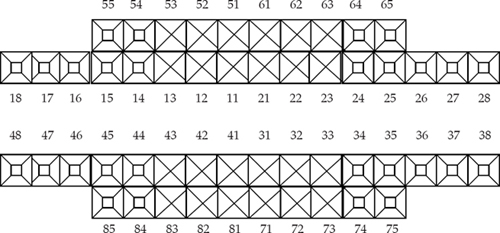

Supplement: Supplementary file 1 [file 3eefe6ab584ccaef7343da69.docx]
